# Supplementary material
Source: PubMed Central journal article supplement (PMC4204669)
Supplement: supp_mcu142_mcu142supp.pdf [file supp_mcu142_mcu142supp.pdf]

## SUPPLEMENTARY DATA

Table S1. General characteristics of the study provenances. Description of provenances which form the provenance-progeny trial, including: geographical co-ordinates (latitude, longitude), elevation (m), percentage of serotiny (*S*; proportion of closed cones in relation to total cones of all trees that at least had one closed cone in total; mean  $\pm$  s.d.), total open cones (number of total open cones), total closed cones (number of total closed cones), mean height (cm), winter rainfall: December, January and February (Winter R; mm), spring rainfall: March, April and May (Spring R; mm), summer rainfall: June, July and August (Summer R; mm), fall rainfall: September, October and November (Fall R; mm), average annual temperature (AAT), mean temperature of the warmest month (MTWM), mean temperature of the coldest month (MTCM) and daily average of thermal oscillation in °C (DATO) by provenance.

| Code | Province    | Provenance                 | Longitude | Latitude | Elevation | <i>S</i>          | Total open cones | Total closed cones | Mean height |
|------|-------------|----------------------------|-----------|----------|-----------|-------------------|------------------|--------------------|-------------|
| 11   | Girona      | Cabanellas                 | 2.78      | 42.25    | 232       | 24.59 $\pm$ 32.49 | 311              | 73                 | 473.08      |
| 21   | Tarragona   | Tivissa                    | 0.76      | 41.06    | 336       | 47.87 $\pm$ 38.19 | 174              | 136                | 461.60      |
| 31   | Barcelona   | Sant Salvador de Guardiola | 1.76      | 41.67    | 377       | 39.11 $\pm$ 32.47 | 348              | 178                | 468.52      |
| 51   | Zaragoza    | Sierra de Luna             | -0.96     | 42.23    | 664       | 75.31 $\pm$ 28.95 | 203              | 410                | 419.13      |
| 61   | Zaragoza    | Zuera                      | -0.92     | 41.92    | 576       | 69.87 $\pm$ 29.88 | 263              | 453                | 403.23      |
| 62   | Zaragoza    | Villanueva de Huerva       | -1.05     | 41.35    | 619       | 44.67 $\pm$ 36.76 | 409              | 249                | 431.68      |
| 71   | Teruel      | Hijar                      | -0.42     | 41.10    | 489       | 39.14 $\pm$ 30.82 | 379              | 263                | 426.72      |
| 72   | Teruel      | Monroyo                    | 0.03      | 40.80    | 628       | 40.02 $\pm$ 36.34 | 285              | 121                | 441.81      |
| 81   | Guadalajara | Valtrabado del Rio         | -2.39     | 40.74    | 849       | 30.93 $\pm$ 30.10 | 468              | 194                | 413.24      |
| 82   | Guadalajara | Valdeconcha                | -2.87     | 40.45    | 758       | 41.85 $\pm$ 33.21 | 393              | 189                | 398.93      |
| 92   | Valencia    | Tuéjar                     | -1.16     | 39.82    | 729       | 67.79 $\pm$ 31.74 | 298              | 571                | 453.69      |
| 101  | Alicante    | Tibi                       | -0.65     | 38.52    | 976       | 80.10 $\pm$ 24.13 | 152              | 471                | 447.91      |
| 102  | Castellon   | Altura                     | -0.61     | 39.79    | 640       | 60.90 $\pm$ 33.84 | 617              | 605                | 453.66      |
| 103  | Albacete    | Villa de Ves               | -1.25     | 39.18    | 864       | 68.17 $\pm$ 30.43 | 281              | 737                | 468.19      |
| 111  | Castellon   | Benicasim                  | 0.03      | 40.08    | 468       | 64.05 $\pm$ 41.35 | 46               | 101                | 442.19      |
| 131  | Alicante    | Villajoyosa                | -0.30     | 38.50    | 126       | 57.64 $\pm$ 37.62 | 239              | 317                | 416.00      |
| 141  | Murcia      | Ricote                     | -1.43     | 38.14    | 688       | 84.36 $\pm$ 20.38 | 201              | 775                | 439.07      |
| 144  | Albacete    | Paterna                    | -2.28     | 38.63    | 1028      | 35.77 $\pm$ 29.16 | 497              | 219                | 425.74      |
| 152  | Granada     | Benamaurel                 | -2.74     | 37.70    | 908       | 72.66 $\pm$ 22.63 | 280              | 602                | 453.74      |
| 153  | Almeria     | Velez Blanco               | -2.02     | 37.79    | 848       | 53.48 $\pm$ 33.87 | 411              | 380                | 438.40      |

|     |          |                       |       |       |     |               |     |     |        |
|-----|----------|-----------------------|-------|-------|-----|---------------|-----|-----|--------|
| 154 | Jaen     | Santiago de la Espada | -2.47 | 38.23 | 842 | 60.39 ± 29.42 | 601 | 645 | 465.79 |
| 155 | Jaen     | Quesada               | -3.15 | 37.74 | 673 | 87.07 ± 23.51 | 165 | 692 | 408.97 |
| 161 | Jaen     | Cazorla               | -2.79 | 38.11 | 636 | 71.65 ± 26.29 | 475 | 927 | 461.54 |
| 171 | Granada  | Lentegi               | -3.69 | 36.82 | 363 | 81.04 ± 24.94 | 177 | 448 | 433.40 |
| 172 | Malaga   | Carratraca            | -4.83 | 36.84 | 635 | 90.69 ± 16.87 | 119 | 786 | 376.75 |
| 173 | Malaga   | Frigiliana            | -3.92 | 36.82 | 595 | 85.92 ± 18.11 | 245 | 674 | 457.38 |
| 181 | Baleares | Escorca               | 2.88  | 39.81 | 546 | 68.76 ± 22.99 | 290 | 499 | 469.84 |
| 182 | Baleares | Palma de Mallorca     | 2.65  | 39.57 | 62  | 33.76 ± 38.97 | 252 | 127 | 408.17 |
| 183 | Baleares | Ses Salines           | 3.13  | 39.36 | 19  | 47.32 ± 38.32 | 264 | 124 | 417.03 |

| Code | Province    | Provenance                 | Winter R | Spring R | Summer R | Fall R | AAT  | MTWM | MTCM | DATO |
|------|-------------|----------------------------|----------|----------|----------|--------|------|------|------|------|
| 11   | Girona      | Cabanellas                 | 221      | 273      | 219      | 263    | 13.7 | 21.4 | 6.9  | 14.5 |
| 21   | Tarragona   | Tivissa                    | 133      | 159      | 75       | 199    | 15.3 | 25.1 | 6.9  | 18.1 |
| 31   | Barcelona   | Sant Salvador de Guardiola | 101      | 154      | 123      | 191    | 13.9 | 23.4 | 5.5  | 18.0 |
| 51   | Zaragoza    | Sierra de Luna             | 146      | 159      | 119      | 163    | 13.2 | 23.2 | 4.7  | 18.5 |
| 61   | Zaragoza    | Zuera                      | 120      | 145      | 95       | 128    | 12.9 | 23.4 | 4.2  | 19.2 |
| 62   | Zaragoza    | Villanueva de Huerva       | 78       | 131      | 91       | 110    | 13.4 | 23.5 | 5.1  | 18.5 |
| 71   | Teruel      | Hijar                      | 85       | 116      | 82       | 126    | 14.1 | 23.9 | 5.7  | 18.2 |
| 72   | Teruel      | Monroyo                    | 106      | 167      | 112      | 163    | 13.6 | 22.9 | 6.0  | 16.9 |
| 81   | Guadalajara | Valtrabado del Rio         | 185      | 219      | 111      | 186    | 11.4 | 21.3 | 3.8  | 17.5 |
| 82   | Guadalajara | Valdeconcha                | 180      | 157      | 80       | 162    | 12.7 | 23.0 | 4.0  | 18.9 |
| 92   | Valencia    | Tuéjar                     | 103      | 138      | 102      | 140    | 14.0 | 23.7 | 6.3  | 17.4 |
| 101  | Alicante    | Tibi                       | 144      | 137      | 58       | 164    | 13.0 | 22.2 | 6.1  | 16.1 |
| 102  | Castellon   | Altura                     | 132      | 138      | 77       | 203    | 14.1 | 22.7 | 7.5  | 15.2 |
| 103  | Albacete    | Villa de Ves               | 126      | 125      | 82       | 156    | 13.5 | 23.0 | 5.9  | 17.1 |
| 111  | Castellon   | Benicasim                  | 110      | 120      | 77       | 220    | 15.4 | 23.3 | 9.2  | 14.1 |
| 131  | Alicante    | Villajoyosa                | 99       | 94       | 42       | 156    | 16.7 | 24.7 | 10.0 | 14.7 |
| 141  | Murcia      | Ricote                     | 70       | 101      | 44       | 106    | 15.8 | 24.9 | 8.6  | 16.4 |
| 144  | Albacete    | Paterna                    | 180      | 166      | 67       | 139    | 13.2 | 24.1 | 4.5  | 19.6 |
| 152  | Granada     | Benamaurel                 | 134      | 109      | 44       | 107    | 14.3 | 24.1 | 6.5  | 17.6 |
| 153  | Almeria     | Velez Blanco               | 68       | 113      | 43       | 105    | 14.2 | 23.8 | 6.8  | 17.1 |
| 154  | Jaen        | Santiago de la Espada      | 201      | 190      | 71       | 152    | 14.1 | 24.9 | 6.1  | 18.8 |

|     |          |                   |     |     |    |     |      |      |      |      |
|-----|----------|-------------------|-----|-----|----|-----|------|------|------|------|
| 155 | Jaen     | Quesada           | 164 | 131 | 39 | 109 | 15.7 | 25.9 | 7.5  | 18.4 |
| 161 | Jaen     | Cazorla           | 366 | 284 | 60 | 201 | 14.4 | 25.0 | 6.0  | 19.0 |
| 171 | Granada  | Lentegi           | 298 | 163 | 31 | 223 | 15.9 | 22.9 | 10.3 | 12.6 |
| 172 | Malaga   | Carratraca        | 244 | 154 | 31 | 196 | 15.4 | 24.6 | 8.2  | 16.4 |
| 173 | Malaga   | Frigiliana        | 286 | 183 | 26 | 201 | 15.2 | 23.9 | 8.5  | 15.4 |
| 181 | Baleares | Escorca           | -   | -   | -  | -   | -    | -    | -    | -    |
| 182 | Baleares | Palma de Mallorca | -   | -   | -  | -   | -    | -    | -    | -    |
| 183 | Baleares | Ses Salines       | -   | -   | -  | -   | -    | -    | -    | -    |

---

Table S2. Overview of  $Q_{ST}$  estimates of various studies on pine species.  $Q_{ST}$  estimates for different traits provided by various pine species studies, including the present study.

| Family   | Species                              | $Q_{ST}$ | Trait                         | Reference     |
|----------|--------------------------------------|----------|-------------------------------|---------------|
| Pinaceae | <i>Pinus contorta ssp. latifolia</i> | 0.006    | Branch angle                  | 1             |
| Pinaceae | <i>Pinus pinaster</i>                | 0.010    | Wood density (max)            | 2             |
| Pinaceae | <i>Pinus pinaster</i>                | 0.020    | Wood density (mean)           | 2             |
| Pinaceae | <i>Pinus pinaster</i>                | 0.027    | Cavitation resistance         | 3             |
| Pinaceae | <i>Pinus pinaster</i>                | 0.030    | Wood density (min)            | 2             |
| Pinaceae | <i>Pinus contorta ssp. latifolia</i> | 0.057    | Branch diameter               | 1             |
| Pinaceae | <i>Pinus brutia</i>                  | 0.065    | Diameter                      | 4             |
| Pinaceae | <i>Pinus canariensis</i>             | 0.077    | Height                        | 12            |
| Pinaceae | <i>Pinus brutia</i>                  | 0.095    | Height                        | 4             |
| Pinaceae | <i>Pinus albicaulis</i>              | 0.110    | Late winter cold hardiness    | 5             |
| Pinaceae | <i>Pinus brutia</i>                  | 0.119    | Diameter                      | 4             |
| Pinaceae | <i>Pinus halepensis</i>              | 0.120    | Early reproductive allocation | 6             |
| Pinaceae | <i>Pinus halepensis</i>              | 0.120    | Volume over bark              | 6             |
| Pinaceae | <i>Pinus albicaulis</i>              | 0.120    | Height                        | 5             |
| Pinaceae | <i>Pinus halepensis</i>              | 0.120    | Height growth                 | 7             |
| Pinaceae | <i>Pinus contorta ssp. latifolia</i> | 0.133    | Specific gravity              | 1             |
| Pinaceae | <i>Pinus pinaster</i>                | 0.140    | Total above-ground biomass    | 2             |
| Pinaceae | <i>Pinus contorta ssp. latifolia</i> | 0.161    | Branch length                 | 1             |
| Pinaceae | <i>Pinus contorta ssp. latifolia</i> | 0.166    | Stem diameter                 | 1             |
| Pinaceae | <i>Pinus brutia</i>                  | 0.170    | Height                        | 4             |
| Pinaceae | <i>Pinus brutia</i>                  | 0.182    | Height                        | 4             |
| Pinaceae | <i>Pinus pinaster</i>                | 0.188    | Annual increase in height     | 3             |
| Pinaceae | <i>Pinus contorta ssp. latifolia</i> | 0.195    | Stem height                   | 1             |
| Pinaceae | <i>Pinus pinaster</i>                | 0.197    | Carbon isotope ratio          | 3             |
| Pinaceae | <i>Pinus sylvestris</i>              | 0.200    | Height growth                 | 8             |
| Pinaceae | <i>Pinus halepensis</i>              | 0.210    | Early reproductive allocation | 6             |
| Pinaceae | <i>Pinus brutia</i>                  | 0.214    | Diameter                      | 4             |
| Pinaceae | <i>Pinus pinaster</i>                | 0.220    | Total leaf area               | 2             |
| Pinaceae | <i>Pinus canariensis</i>             | 0.225    | Survival                      | 12            |
| Pinaceae | <i>Pinus albicaulis</i>              | 0.250    | Survival                      | 5             |
| Pinaceae | <i>Pinus brutia</i>                  | 0.281    | Height                        | 4             |
| Pinaceae | <i>Pinus halepensis</i>              | 0.290    | Volume over bark              | 6             |
| Pinaceae | <i>Pinus halepensis</i>              | 0.320    | Serotiny                      | Present study |
| Pinaceae | <i>Pinus sylvestris</i>              | 0.364    | Budset                        | 9             |
| Pinaceae | <i>Pinus brutia</i>                  | 0.384    | Diameter                      | 4             |
| Pinaceae | <i>Pinus pinaster</i>                | 0.470    | Collar diameter               | 2             |
| Pinaceae | <i>Pinus pinaster</i>                | 0.730    | Survival                      | 10            |
| Pinaceae | <i>Pinus sylvestris</i>              | 0.770    | Timing of terminal budset     | 11            |
| Pinaceae | <i>Pinus pinaster</i>                | 0.790    | Total height                  | 10            |
| Pinaceae | <i>Pinus pinaster</i>                | 0.970    | Stem form                     | 10            |

## References:

1. **Yang RC, Yeh FC, Yanchuk AD. 1996.** A comparison of isozyme and quantitative genetic variation in *Pinus contorta* ssp. *latifolia* by FST. *Genetics* **142**: 1045–1052.
2. **Lamy JB, Lagane F, Plomion C, Cochard H, Delzon S. 2012.** Micro-evolutionary patterns of juvenile wood density in a pine species. *Plant Ecology* **213**: 1781–1792.
3. **Lamy JB, Bouffier L, Burlett R, Plomion C, Cochard H, Delzon S. 2011.** Uniform selection as a primary force reducing population genetic differentiation of cavitation resistance across a species range. *PLoS One* **6**: e23476.
4. **Kurt Y, González-Martínez SC, Alía R, Isik K. 2012.** Genetic differentiation in *Pinus brutia* Ten. using molecular markers and quantitative traits: the role of altitude. *Annals of Forest Science* **69**: 345–351.
5. **Mahalovich MF, Hipkins VD. 2011.** Molecular genetic variation in whitebark pine (*Pinus albicaulis* Engelm.) in the Inland West. In: Keane RE, Tomback DF, Murray MP, Smith CM, eds. The future of high-elevation, five-needle white pines in Western North America: Proceedings of the High Five Symposium. *Proceedings RMRS*.
6. **Santos-del-Blanco L, Notivol E, Zas R, Chambel MR, Majada J, Climent J. 2010.** Variation of early reproductive allocation in multi-site genetic trials of Maritime pine and Aleppo pine. *Forest Systems* **19**: 381–392.
7. **Alía R, Gómez A, Agúndez MD, Bueno MA, Notivol E. 2001.** Levels of genetic differentiation in *Pinus halepensis* Mill. in Spain using quantitative traits, isozymes, RAPDs and cp-microsatellites. In: *Genetic Response of Forest Systems to Changing Environmental Conditions*: 151–160. Springer Netherlands.
8. **Bastien C, Alía R. 2008.** What might be useful measures of genetic variability for adaptive traits within populations of Scots pine?. *Forest Systems* **9**: 97–110.
9. **Karhu A, Hurme P, Karjalainen M et al. 1996.** Do molecular markers reflect patterns of differentiation in adaptive traits of conifers?. *Theoretical and Applied Genetics* **93**: 215–221.
10. **González-Martínez SC, Alía R, Gil L. 2002.** Population genetic structure in a Mediterranean pine (*Pinus pinaster* Ait.): a comparison of allozyme markers and quantitative traits. *Heredity* **89**: 199–206.
11. **Waldmann P, Garcia-Gil MR, Sillanpää MJ. 2005.** Comparing Bayesian estimates of genetic differentiation of molecular markers and quantitative traits: an application to *Pinus sylvestris*. *Heredity* **94**: 623–629.
12. **de Heredia UL, López R, Collada C, Emerson BC, Gil L. 2014.** Signatures of volcanism and aridity in the evolution of an insular pine (*Pinus canariensis* Chr. Sm. Ex DC in Buch). *Heredity*, in press. doi:10.1038/hdy.2014.22.
